# Supplementary material
Source: HighWire-hosted journal article supplement (https://bmjopenrespres.bmj.com/content/6/1/e000437)
Supplement: inline-supplementary-material-1 [file inline-supplementary-material-1.pdf]

**S1 Table. Primers targeting VP4/2 region for molecular classification.**

| <b>Primer Name</b> | <b>Sequence</b>           |
|--------------------|---------------------------|
| VP4VP2-F2          | CCGGCCCCTGAATGYGGCTAA     |
| VP4VP2-R2          | ACATRTTYTSNCCAAANAYDCCCAT |
| VP4VP2-F3          | ACCRACTACTTTGGGTGTCCGTG   |
| VP4VP2-R3          | TCWGGHARYTTCCAMCACCANCC   |
